# Supplementary material for: From in vitro to in vivo: Integration of the virtual cell based assay with physiologically based kinetic modelling
Source: PubMed Central journal article supplement (PMC5742636; doi:10.1016/j.tiv.2017.06.015), 2017-12
Supplement: mmc1.pdf [file mmc1.pdf]

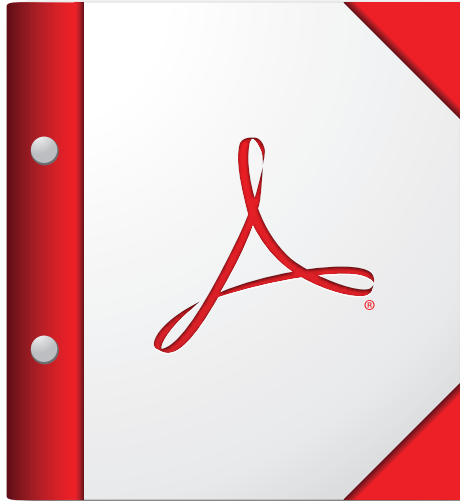

**For the best experience, open this PDF portfolio in  
Acrobat 9 or Adobe Reader 9, or later.**

[Get Adobe Reader Now!](#)
